# Supplementary material for: Rapid homogeneous assay for detecting antibodies against SARS-CoV-2
Source: bioRxiv or medRxiv preprint supplement (doi:10.1101/2020.11.01.20224113), 2020-11-04
Supplement: Supplementary file [file media-1.pdf]

# 1 Supplementary Information

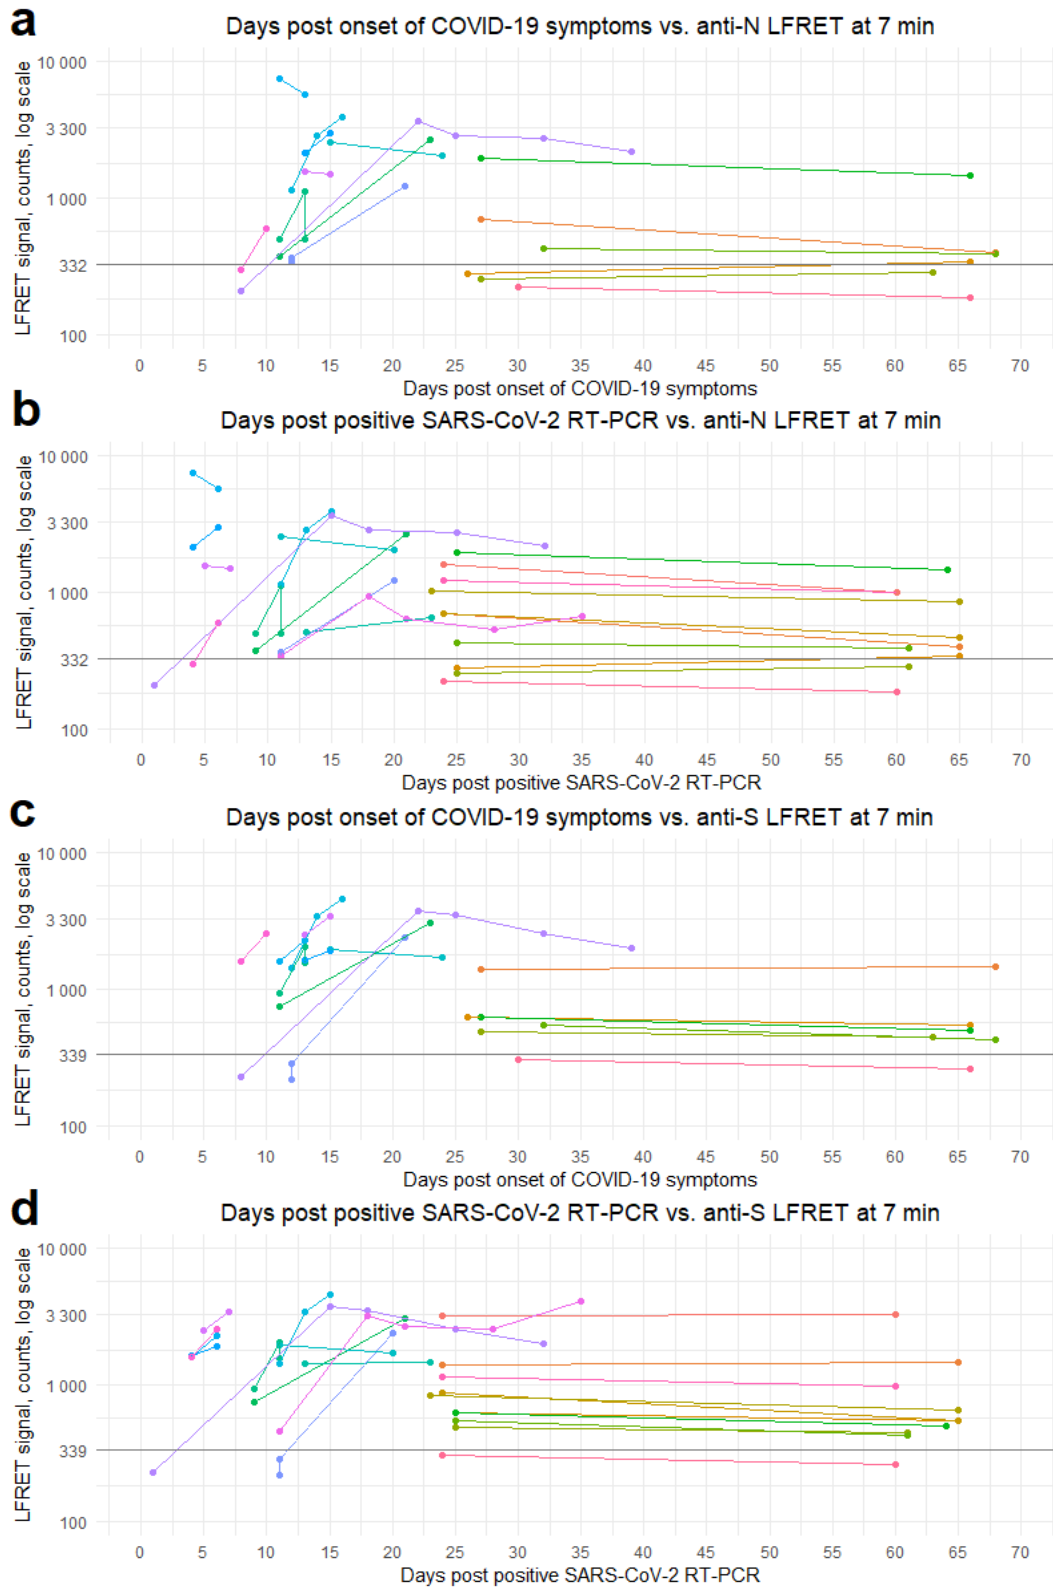

2  
 3 **Figure S1.** Development of LFRET signals in follow-up samples. a) Days post onset of  
 4 COVID-19 symptoms (x-axis) vs anti-N LFRET signal (y-axis) (N=38 samples from 16  
 5 individuals). b) Days post positive SARS-CoV-2 PCR (x-axis) vs anti-N LFRET signal (y-  
 6 axis) (N=53 samples from 22 individuals). c) Days post onset of COVID-19 symptoms (x-  
 7 axis) vs anti-S LFRET signal (y-axis) (N=38 samples from 16 individuals). d) Days post  
 8 positive SARS-CoV-2 PCR (x-axis) vs anti-S LFRET signal (y-axis) (N=53 samples from  
 9 22 individuals). Horizontal line is the LFRET cutoff. S = spike glycoprotein. N =  
 10 nucleocapsid protein. LFRET = protein L-based time-resolved Förster resonance energy  
 11 transfer immunoassay.

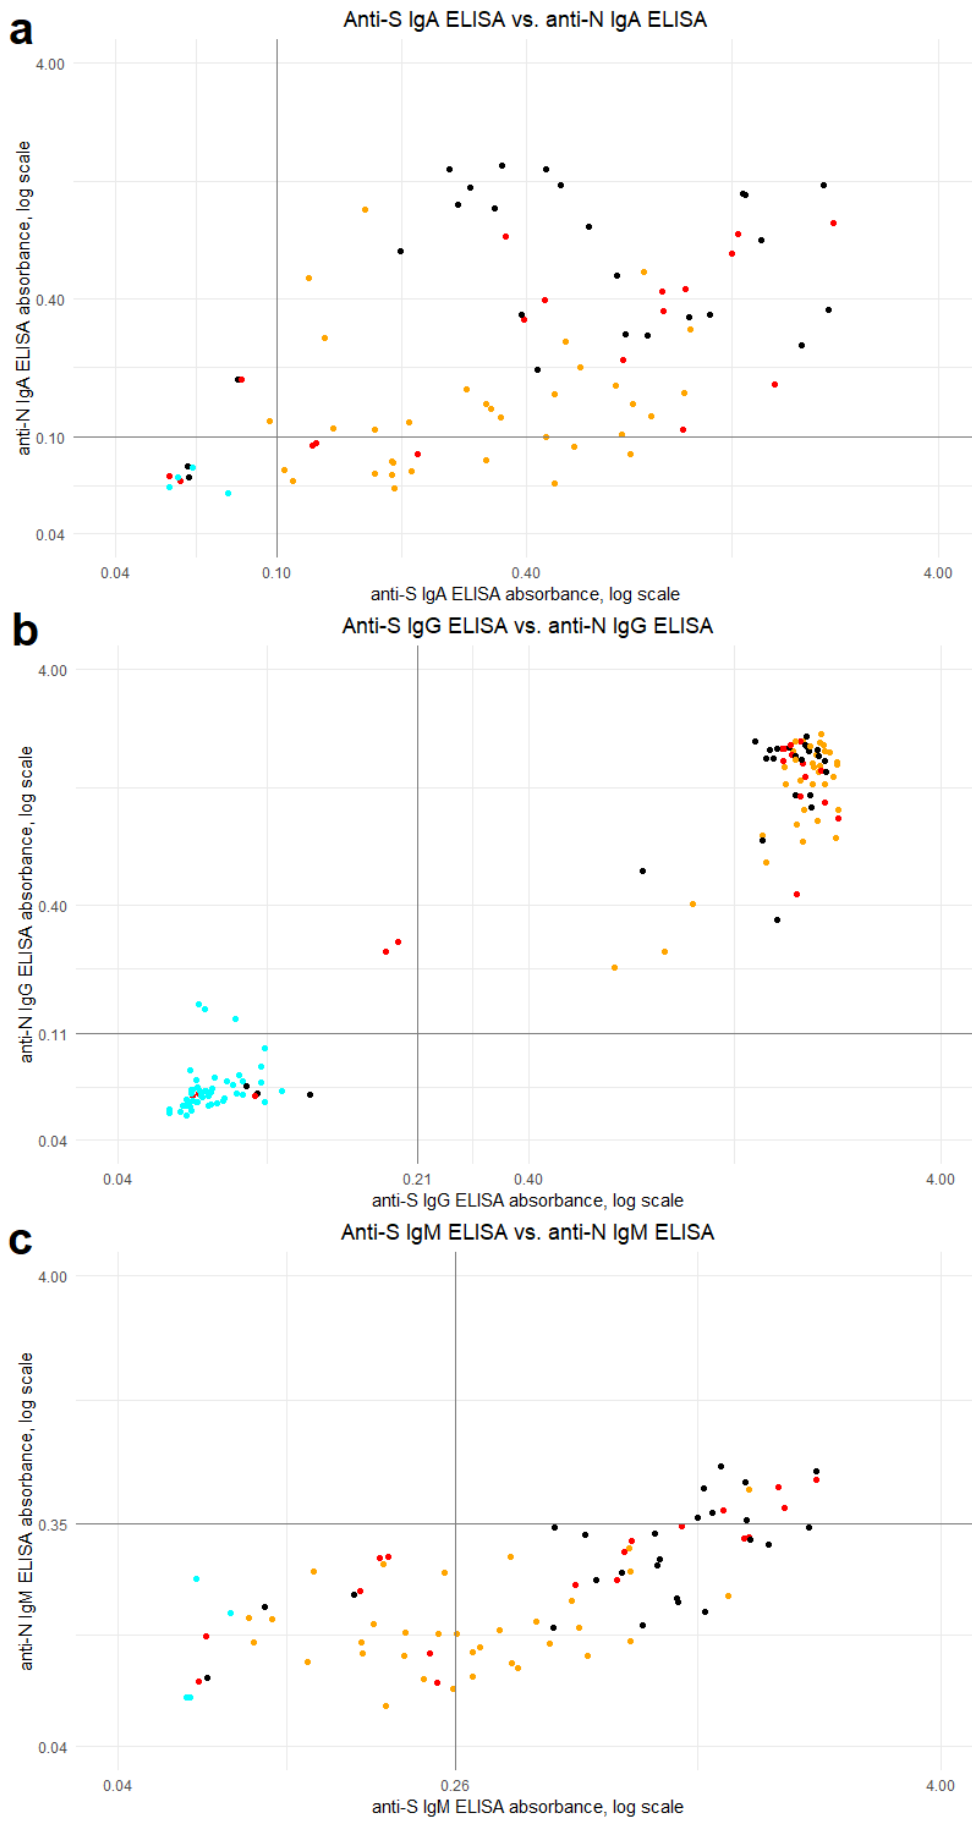

12  
 13 **Figure S2.** SARS-CoV-2 spike glycoprotein (S) versus nucleocapsid protein (N)  
 14 ELISA. a) anti-S vs. anti-N IgA ELISA results (N=81, R=0.31) b) anti-S vs. anti-N IgG  
 15 ELISA results (N=129, R=0.90). c) anti-S vs. anti-N IgM ELISA results (N=81,  
 16 R=0.79). On the x-axis, anti-S ELISA absorbance, on the y-axis anti-N ELISA  
 17 absorbance. Colour of the dot indicates SARS-CoV-2 PCR result and disease severity:  
 18 cyan = PCR negative; yellow = non-hospitalized, PCR-positive; red = non-ICU  
 19 hospitalized, PCR positive; black = hospitalized in ICU, PCR positive. Horizontal and  
 20 vertical lines indicate ELISA cutoffs. R = Pearson's correlation coefficient.

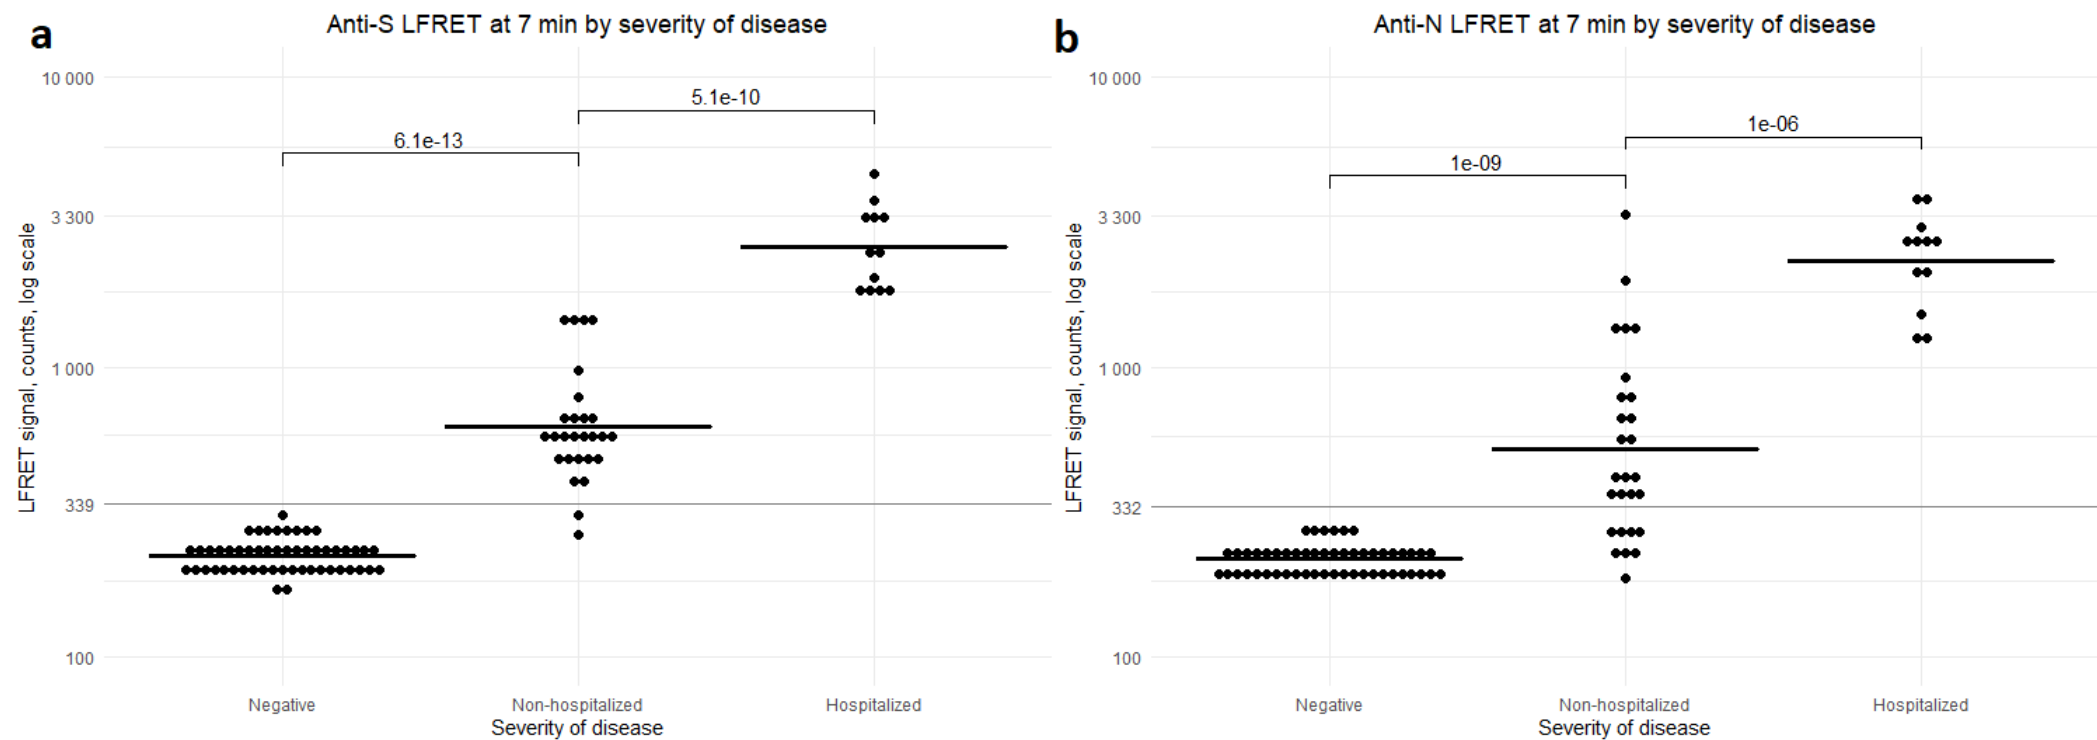

21

22 **Figure S3.** LFRET vs. severity of disease in samples taken after two weeks from onset of disease. a) Severity of disease (x-axis) vs. anti-S LFRET (y-axis) b) Severity  
 23 of disease (x-axis) vs. anti-N LFRET (y-axis). Negative = samples from comprehensively SARS-CoV-2 seronegative individuals (N=52). Non-hospitalized = samples  
 24 from non-hospitalized COVID-19 patients (N=27). Samples from hospitalized individuals with COVID-19 (N=12) are grouped together to include samples from  
 25 individuals treated outside of ICU (N=3) and in ICU (N=9). Horizontal lines indicate LFRET cutoffs (thin grey lines) and mean LFRET signal (thick black lines).  
 26 Logarithmic scale is used on the y-axis. Differences between groups are statistically significant, as indicated by the p values within the figure. S = spike glycoprotein.  
 27 N = nucleocapsid protein. LFRET = protein L–based time-resolved Förster resonance energy transfer immunoassay.

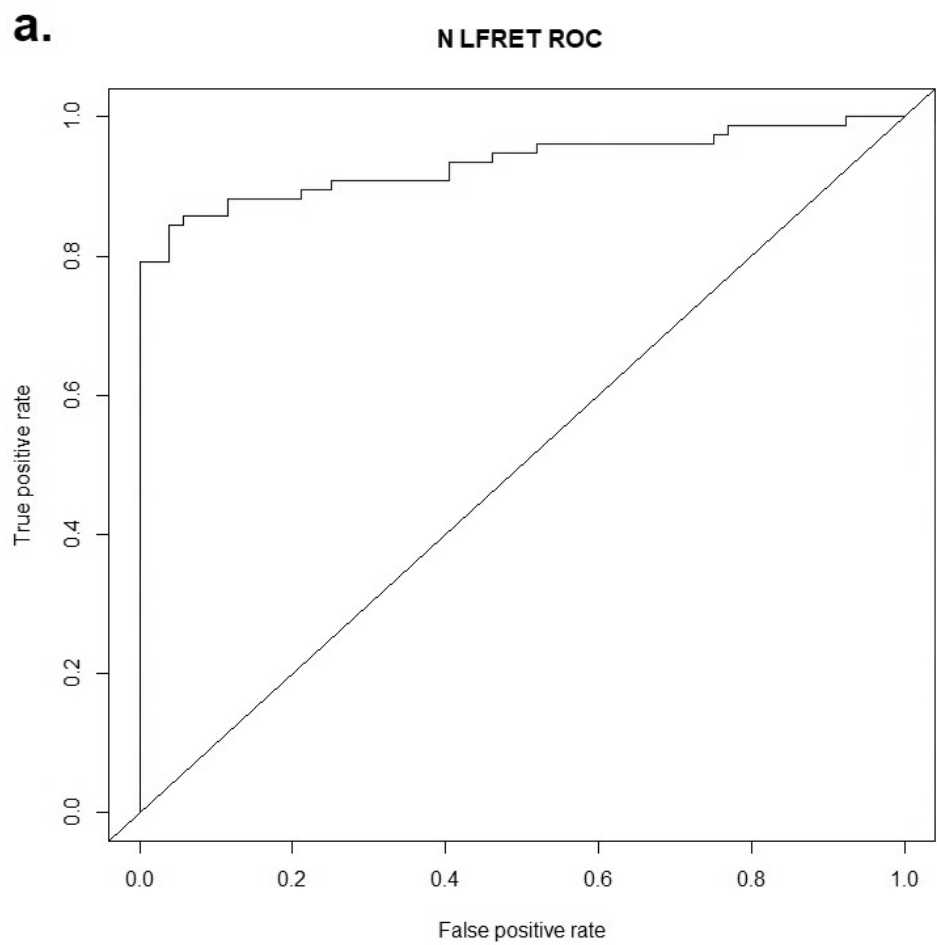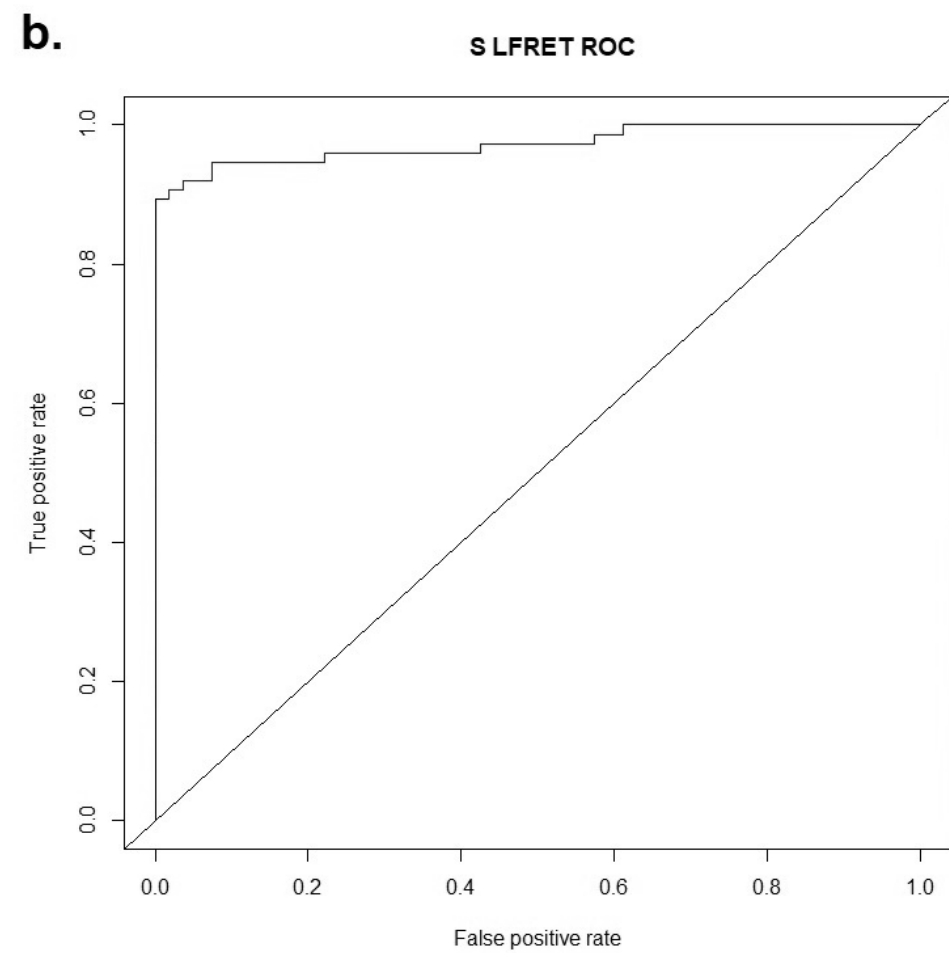

28

29 **Figure S4.** Receiver operating character (ROC) curves for LFRET. a) anti-N LFRET. AUC = 0.94. b) anti-S LFRET. AUC= 0.97. False positive rate on the x-axis,  
 30 true positive rate on the y-axis. Enzyme immunoassay (IgA, IgG and IgM results combined) is used as the reference. N = nucleocapsid protein. S = spike glycoprotein.  
 31 LFRET = protein L–based time-resolved Förster resonance energy transfer immunoassay.

32 **Table S1.** Agreement between ELISA and LFRET. Ig ELISA = IgA, IgG and IgM  
 33 results combined: if any of these are positive, total Ig is considered positive. N/S  
 34 ELISA/LFRET: if either N or S ELISA/LFRET is positive, the N/S result is considered  
 35 positive. Number of samples in brackets. S = spike glycoprotein. N = nucleocapsid  
 36 protein. LFRET = protein L–based time-resolved Förster resonance energy transfer  
 37 immunoassay. ELISA = enzyme immunoassay. MNT = microneutralization titer.

|              | anti-N Ig<br>ELISA | anti-N IgG<br>ELISA | anti-S Ig<br>ELISA | anti-S IgG<br>ELISA | anti N/S Ig<br>ELISA | anti N/S<br>IgG ELISA |
|--------------|--------------------|---------------------|--------------------|---------------------|----------------------|-----------------------|
| N<br>LFRET   | 88%<br>(113/129)   | 89%<br>(115/129)    | 91%<br>(117/129)   | 90%<br>(116/129)    | 87%<br>(112/129)     | 89%<br>(115/129)      |
| S<br>LFRET   | 93%<br>(120/129)   | 95%<br>(122/129)    | 96%<br>(124/129)   | 98%<br>(127/129)    | 92%<br>(119/129)     | 95%<br>(122/129)      |
| N/S<br>LFRET | 95%<br>(122/129)   | 96%<br>(124/129)    | 98%<br>(126/129)   | 97%<br>(125/129)    | 94%<br>(121/129)     | 96%<br>(124/129)      |

38 **Table S2.** Detailed information on samples with discordance between PCR, LFRET and ELISA results.  
 39 Sample = sample id. NAT = nucleic acid testing result for SARS-CoV-2. S = spike glycoprotein. N =  
 40 nucleocapsid protein. LFRET = protein L-based time-resolved Förster resonance energy transfer  
 41 immunoassay. ELISA = enzyme immunoassay. MNT = microneutralization titer. + = result above cutoff.  
 42 - = result below cutoff. Hosp. = Hospitalized, non-ICU. ICU = Hospitalized in ICU. Home = non-  
 43 hospitalized. Neg. = no disease. NA = not available.

44

| Sample | NAT | Severity of disease | Days from onset of symptoms | Days from NAT | anti-S LFRET | anti-N LFRET | anti-S ELISA IgA | anti-S ELISA IgG | anti-S ELISA IgM | anti-N ELISA IgA | anti-N ELISA IgG | anti-N ELISA IgM | MNT |
|--------|-----|---------------------|-----------------------------|---------------|--------------|--------------|------------------|------------------|------------------|------------------|------------------|------------------|-----|
| 71     | +   | Hosp.               | 8                           | 2             | -            | -            | -                | -                | -                | +                | -                | -                | <20 |
| 65     | +   | ICU                 | 8                           | 1             | -            | -            | -                | -                | -                | -                | -                | -                | <20 |
| 72     | +   | ICU                 | 8                           | 2             | -            | -            | -                | -                | -                | -                | -                | -                | <20 |
| 70     | +   | ICU                 | 13                          | 4             | -            | -            | -                | -                | -                | +                | -                | -                | 20  |
| 7      | +   | Home                | 30                          | 24            | -            | -            | +                | +                | -                | +                | +                | -                | <20 |
| 24     | +   | Home                | 66                          | 60            | -            | -            | -                | +                | -                | +                | +                | -                | <20 |
| 86     | +   | Hosp.               | NA                          | 2             | -            | -            | -                | -                | -                | -                | -                | -                | <20 |
| 82     | -   | Neg.                | 27                          | 25            | -            | -            | -                | -                | -                | -                | +                | -                | NA  |
| 92     | -   | Neg.                | 134                         | NA            | -            | -            | -                | -                | -                | -                | +                | -                | <20 |
| 103    | NA  | Neg.                | NA                          | NA            | -            | -            | -                | -                | NA               | NA               | +                | NA               | <20 |
| 121    | NA  | Neg.                | NA                          | NA            | -            | -            | +                | -                | NA               | NA               | -                | NA               | <20 |

45 **Table S3.** Sensitivity and specificity of LFRET/ELISA in detecting microneutralization  
 46 positive (titer  $\geq 20$ ) samples. S = spike glycoprotein. N = nucleocapsid protein. LFRET  
 47 = protein L-based time-resolved Förster resonance energy transfer immunoassay.  
 48 ELISA = enzyme immunoassay. Only 4 negative samples were tested in anti-N IgA and  
 49 IgM as well as anti-S IgM ELISA, and thus specificity of these assays needs to be  
 50 assessed with caution.

|             | anti-S<br>LFRET | anti-N<br>LFRET | anti-S<br>IgA<br>ELISA | anti-S<br>IgG<br>ELISA | anti-S<br>IgM<br>ELISA | anti-N<br>IgA<br>ELISA | anti-N<br>IgG<br>ELISA | anti-N<br>IgM<br>ELISA |
|-------------|-----------------|-----------------|------------------------|------------------------|------------------------|------------------------|------------------------|------------------------|
| Sensitivity | 98%             | 92%             | 98%                    | 98%                    | 79%                    | 88%                    | 98%                    | 20%                    |
| Specificity | 91%             | 96%             | 85%                    | 87%                    | 93%                    | 64%                    | 82%                    | 100%                   |

51
